# Supplementary material
Source: publisher figshare collection journal article supplement (https://microbiology.figshare.com/articles/dataset/_/2064357)
Supplement: Supplementary file 4 [file 1]

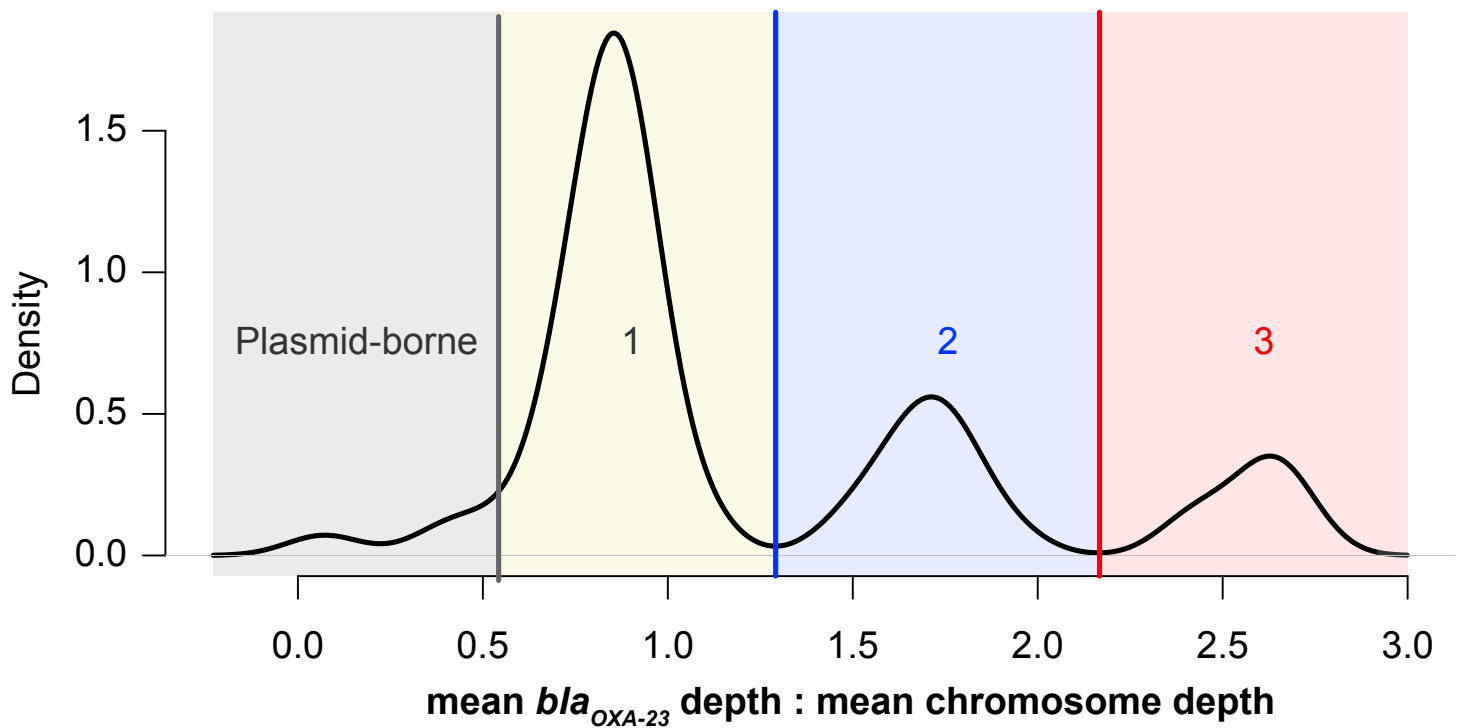

Supplementary Figure 1. Inference of *oxa23* copy number from read depth. Plot shows the distribution of the ratio of average read depths for *oxa23* vs known chromosomal genes, smoothed using a bandwidth of 0.1, for all *oxa23* containing isolates (n=56, isolates listed in Supplementary File 1). Shaded regions highlight cut-off ranges used to assign discrete copy numbers for chromosomal insertions of *oxa23*, which are shown in Table 1 and Figure 4. Note that for the three isolates with depth ratio <0.6, *oxa23* was plasmid located and not inserted in the chromosome.

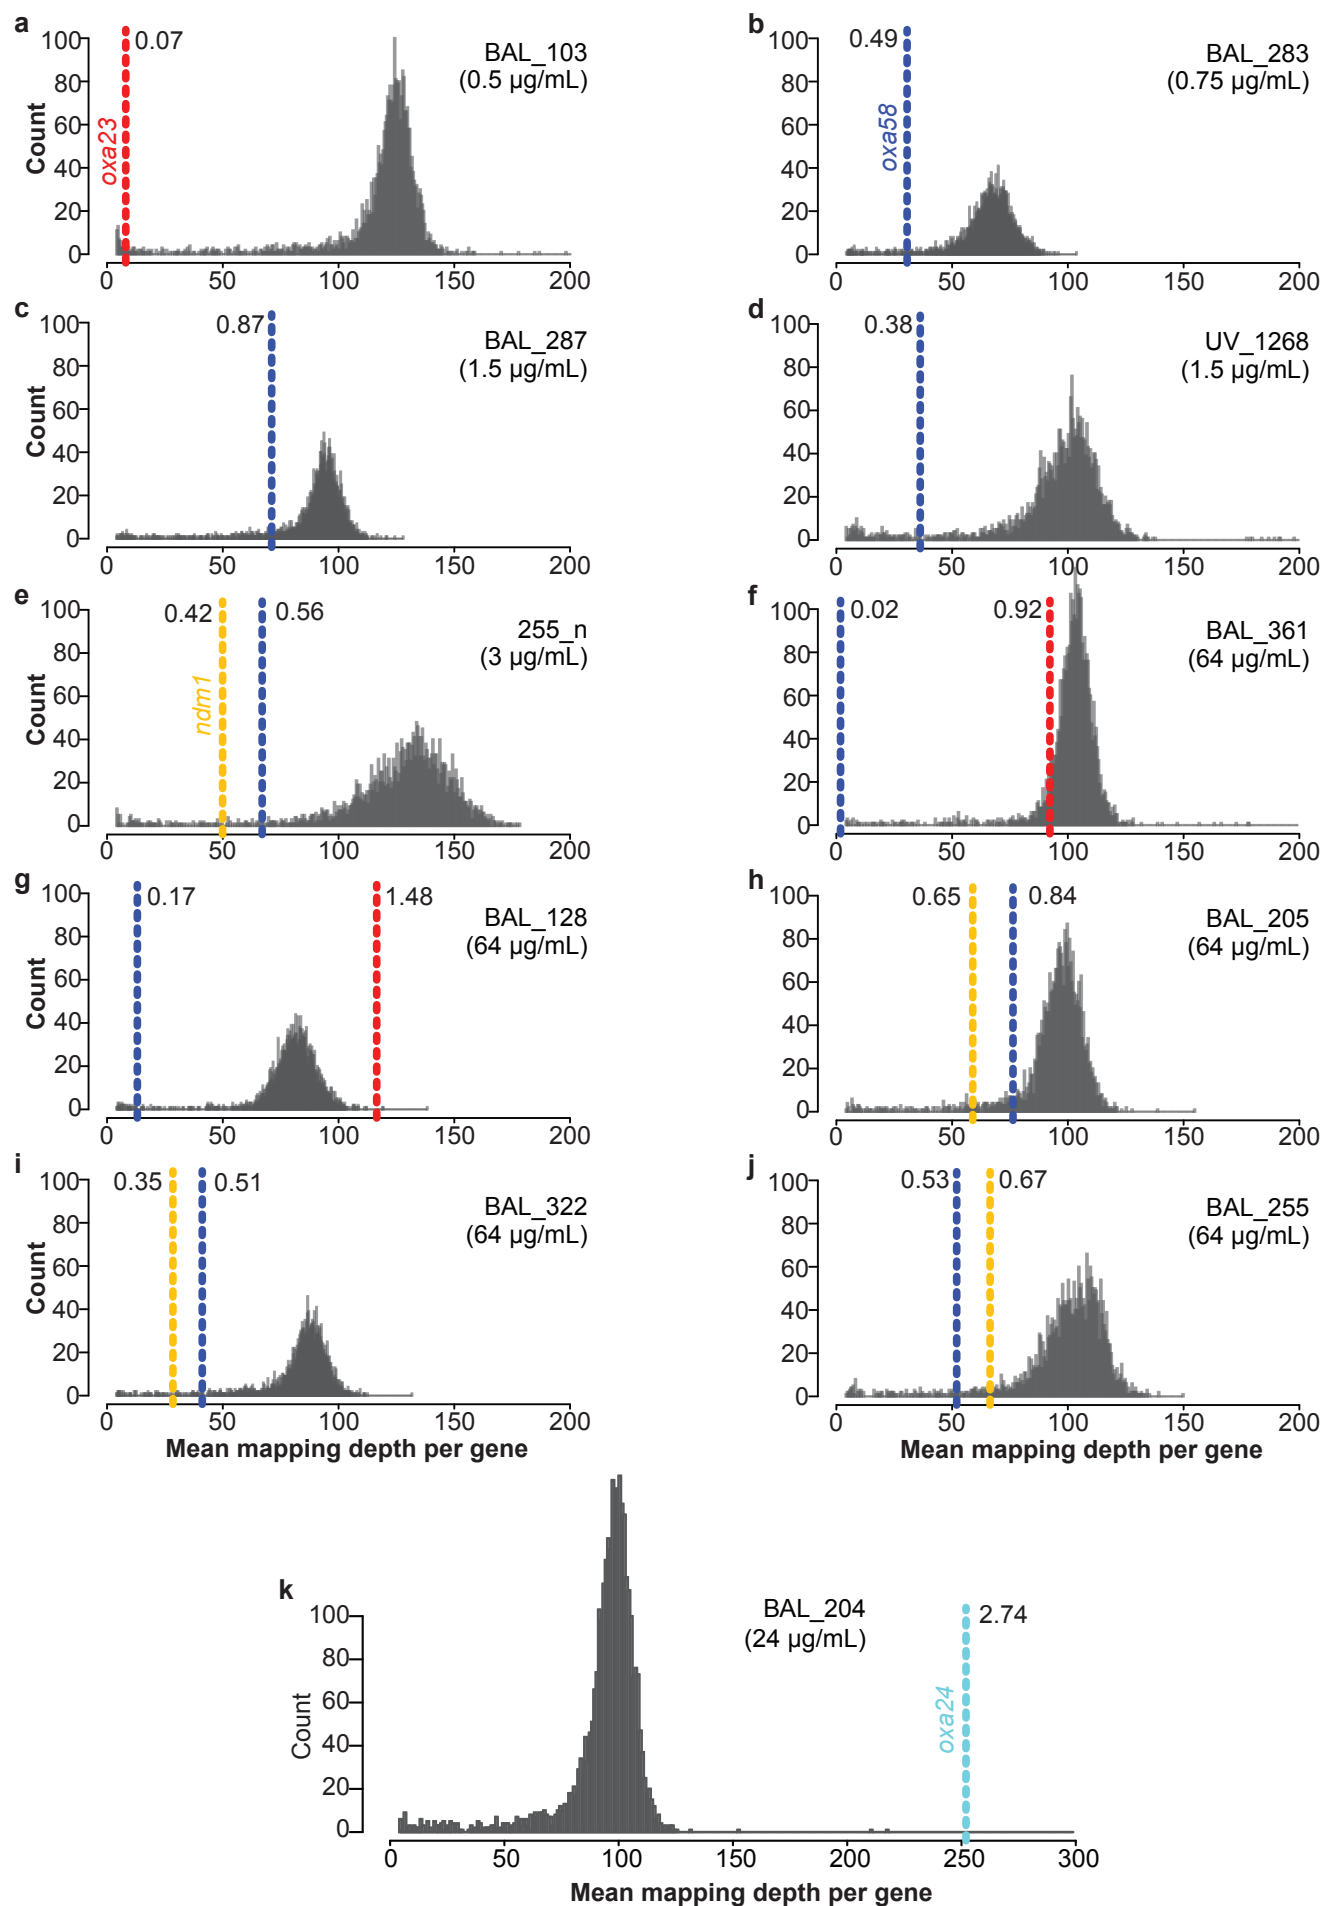

Supplementary Figure 2. Read depth distributions for selected isolates with carbapenemase sequences detected. Histograms indicate distribution of mean read depths for 3,716 chromosomal genes, inferred by mapping of reads to the reference genome. Lines indicate the mean read depth for carbapenemase genes (yellow, *ndm1*; red, *oxa23*; light-blue, *oxa24*; blue, *oxa58*), these are labelled with the ratio of average read depths for the carbapenemase vs the mean depth of the 3,716 chromosomal genes. Panels are labelled with the isolate name, MIC for imipenem is shown in brackets.

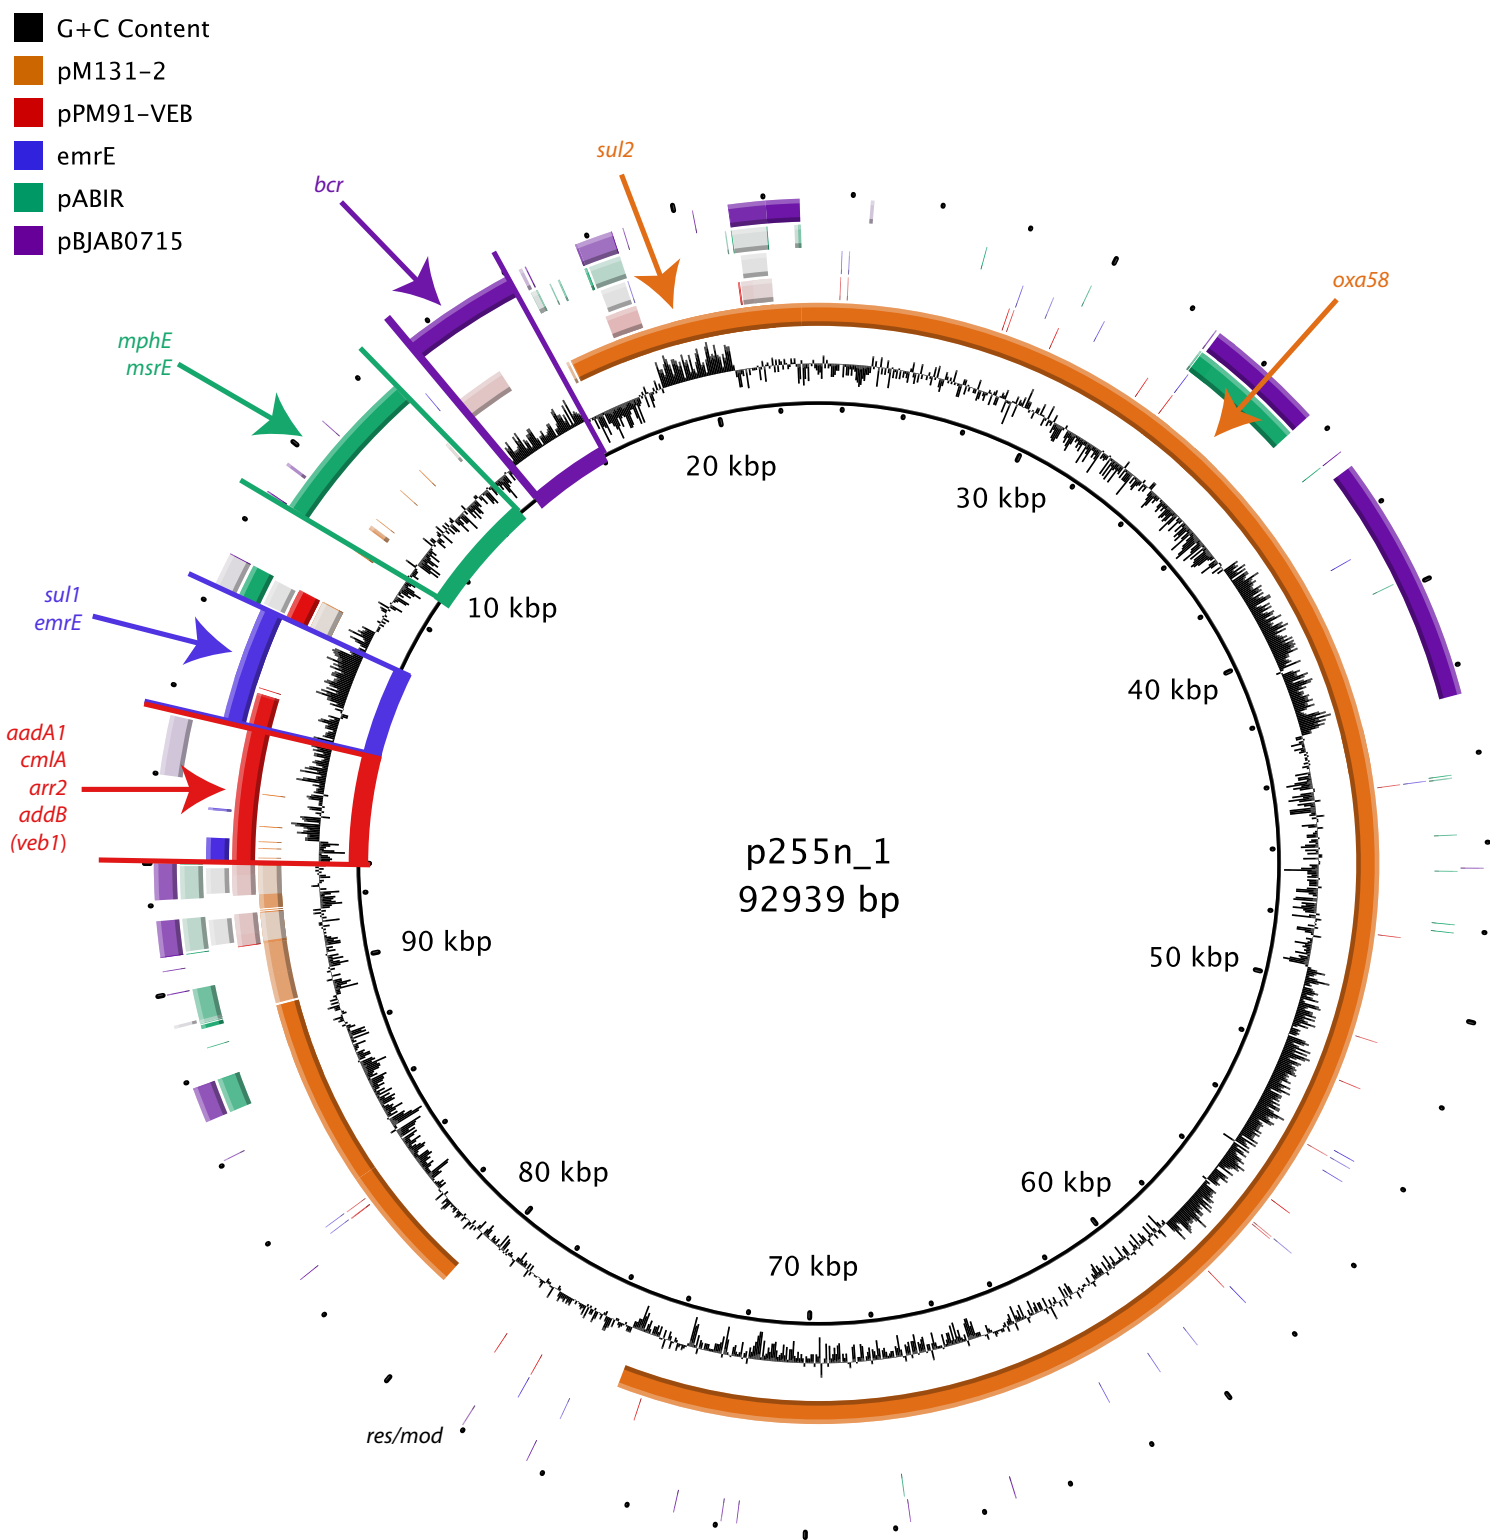

Supplementary Figure 3. Mosaic structure of the novel circular plasmid p255n\_1, bearing *oxa58*, detected in CC10 and CC16 isolates. Inner circle plot indicates G+C content of the plasmid, labelled with plasmid coordinates. Coloured rings show regions of homology to other plasmids: pM131-2, *Acinetobacter* sp. M131 plasmid pM131-2, JX101647.1; pPM91-VEB, *Proteus mirabilis* strain EYG91 plasmid pPM91-VEB (NG\_041554.1); *emrE*, *Acinetobacter* genomosp. 3 strain 3/TCVGH/19991022 (NG\_036847.1); pABIR, *Acinetobacter baumannii* plasmid pABIR (EU294228.1); pBJAB0715, *Acinetobacter baumannii* BJAB0715 plasmid pBJAB0715 (CP003848.1). The annotated sequence of p255n\_1 was submitted to GenBank under accession KT852971.

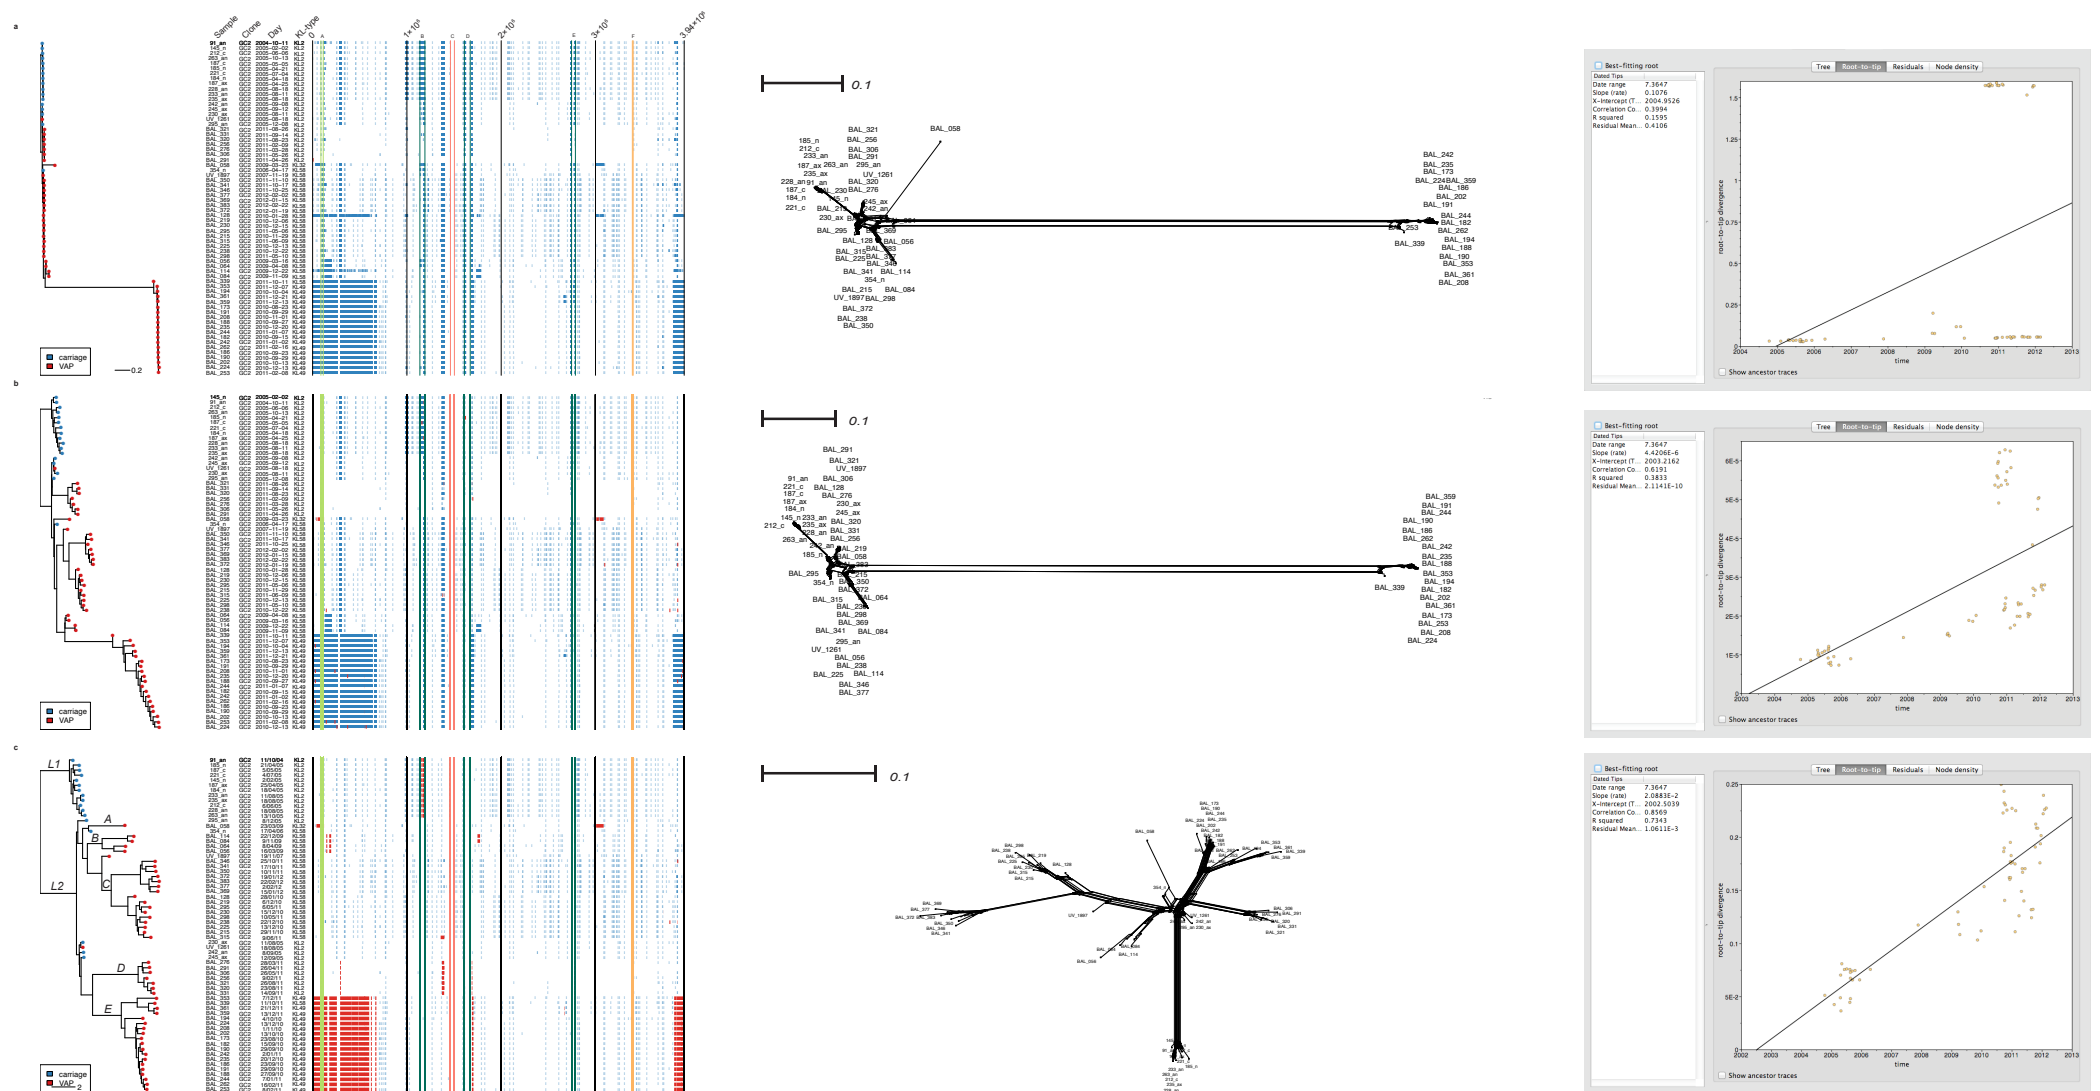

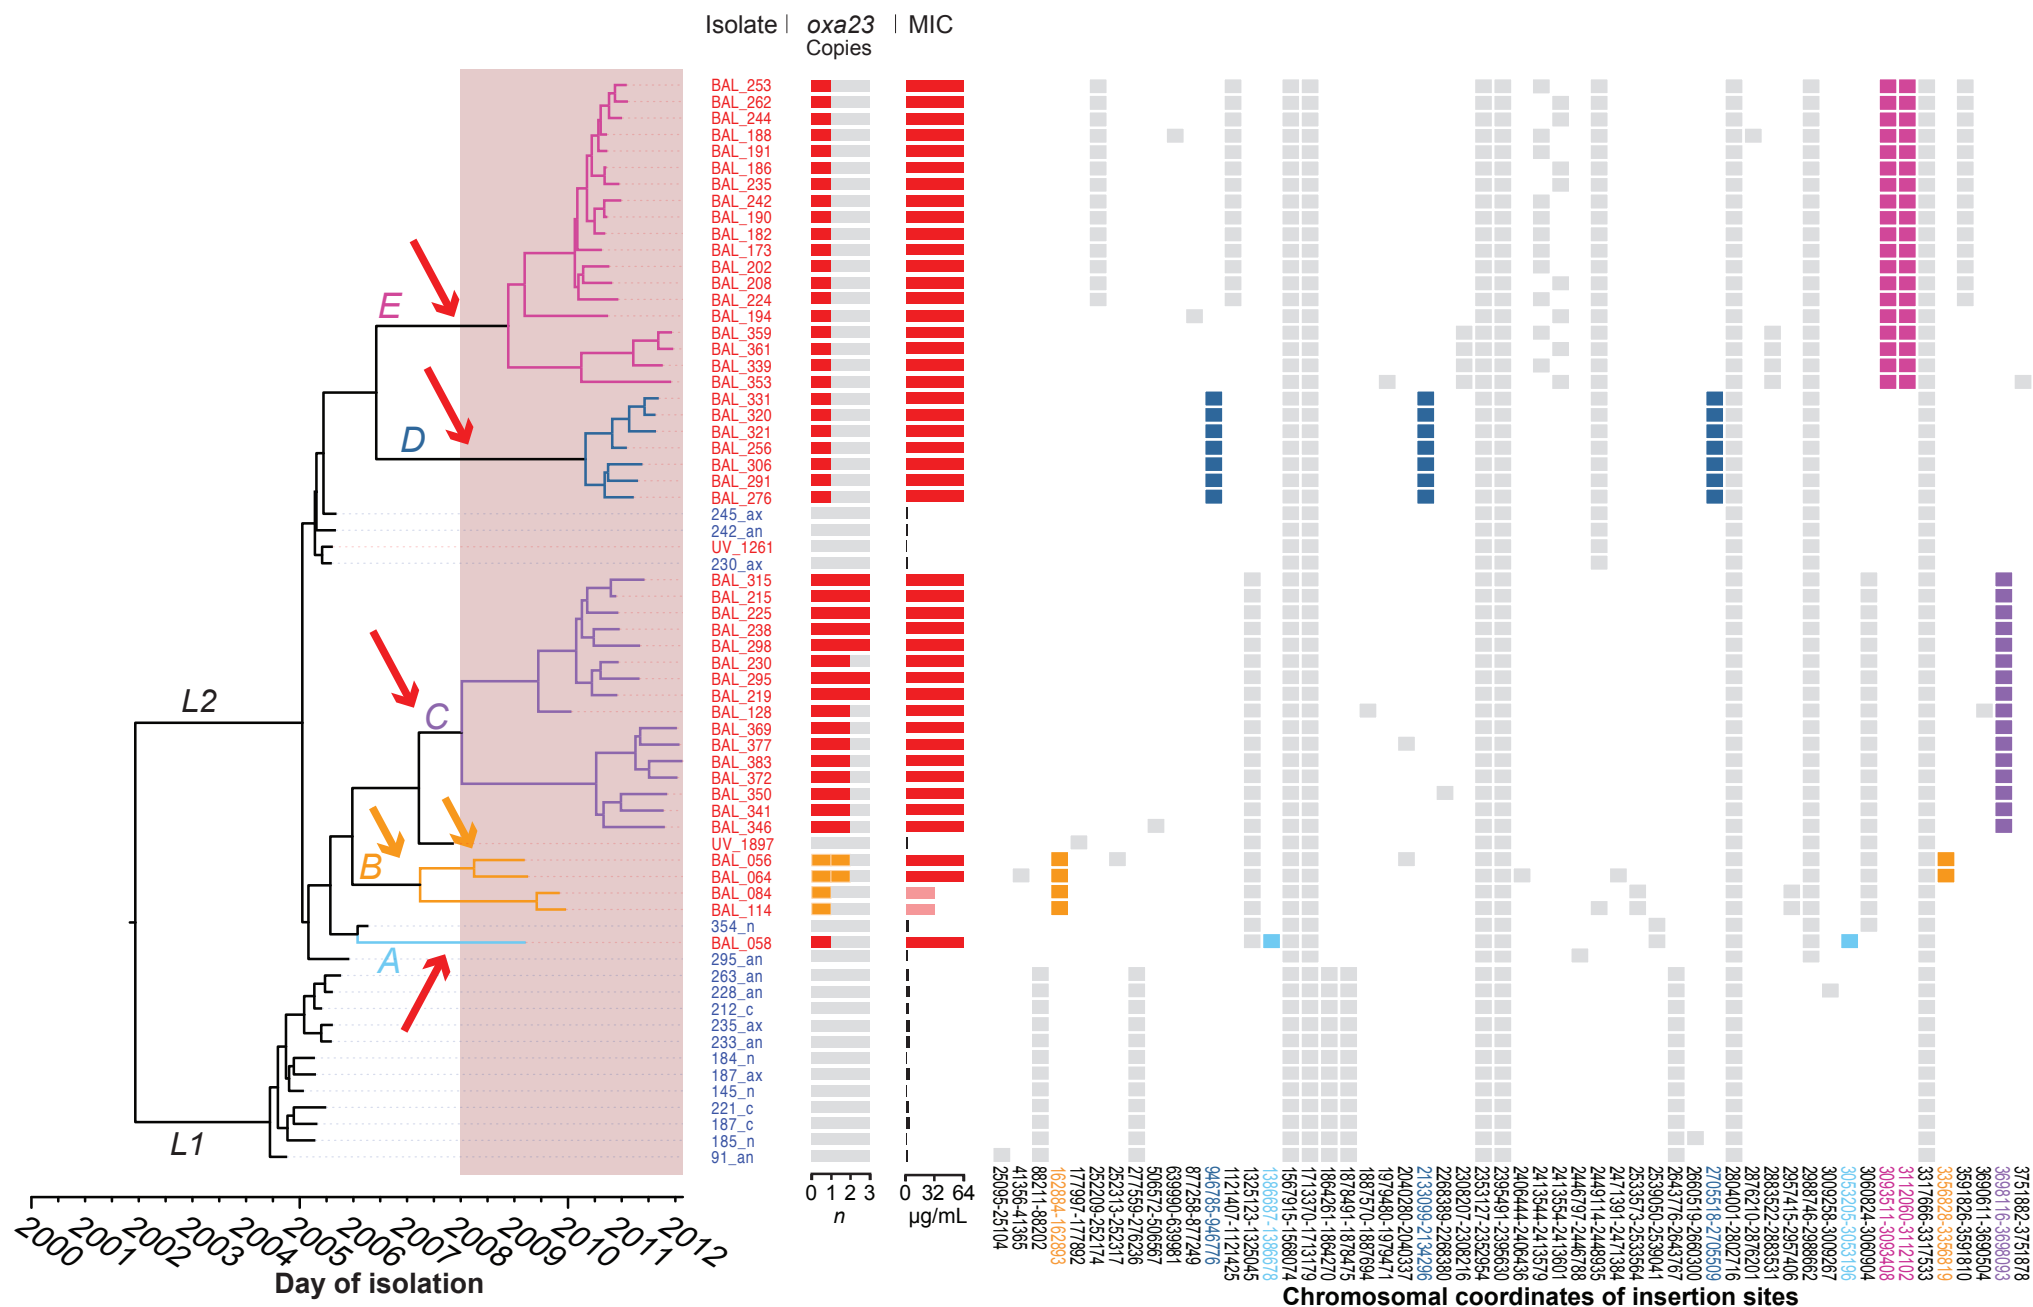

Supplementary Figure 5. Schematic representation of ISAbA1 insertion events in GC2. Left, BEAST tree reproduced from Figure 4, branches coloured to highlight sub-clades carrying *oxa23* within a transposon involving ISAbA1. Right, ISAbA1 insertion sites identified using ISMapper (coordinates are relative to the reference genome accession CP001921.1); insertion events unique to sub-clades are highlighted to match the subclade in the tree.

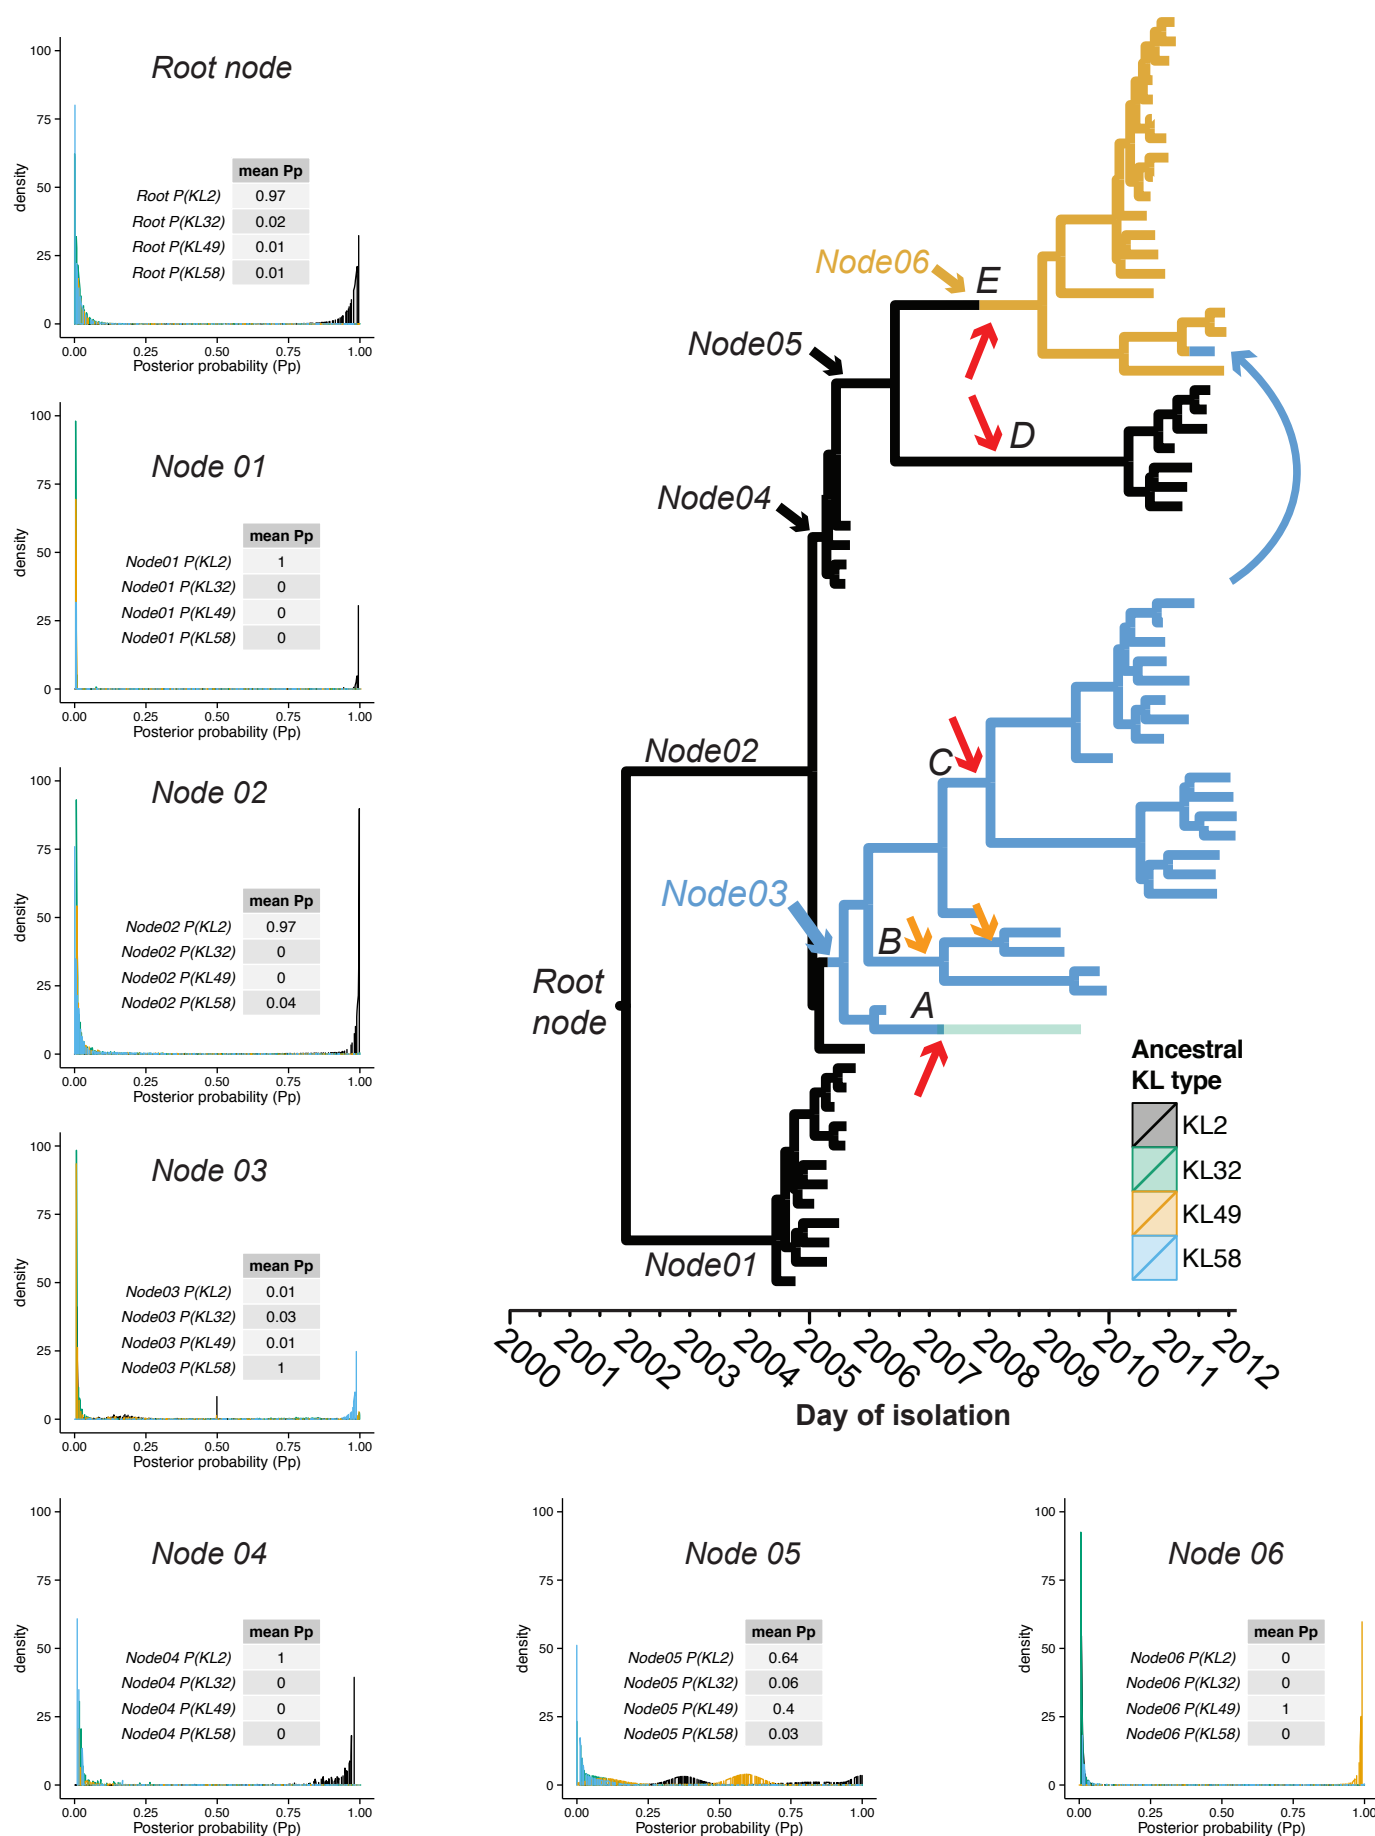

Supplementary Figure 6. Ancestral state probabilities of the K locus for nodes in the GC2 tree. Panels show the posterior probability distributions (plots) and mean values (inset tables) for each GC2 KL type at seven key nodes (including the root). Tree shown is the BEAST for GC2, with the seven key nodes labelled; tree branches are coloured by inferred capsule type transitions; sub-clades A-E are labelled with red and yellow arrows indicating *bla*<sub>OXA-23</sub> transposon events as in Figure 4.
