# Supplementary material
Source: publisher figshare collection journal article supplement (https://microbiology.figshare.com/articles/dataset/_/2064357)

# Capsule biosynthesis gene cluster

KL2

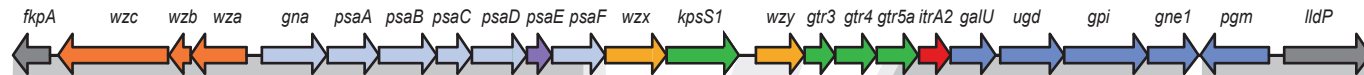

KL58

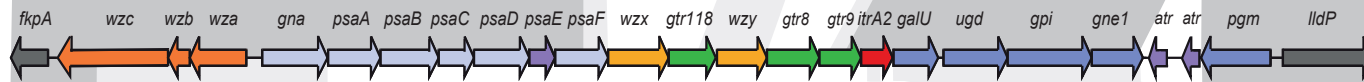

KL49

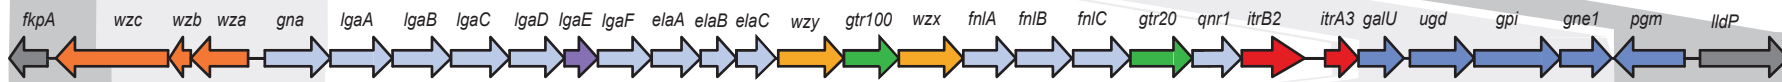

KL32

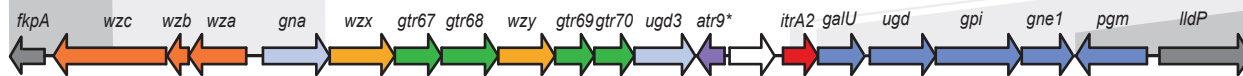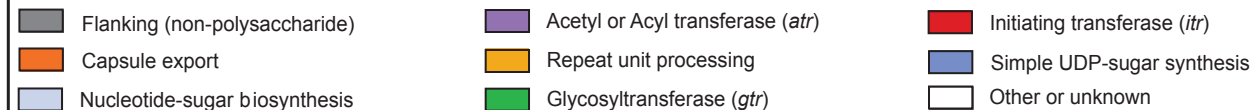

1 kb

Supplement: Supplementary file 1 [file 1]

**a**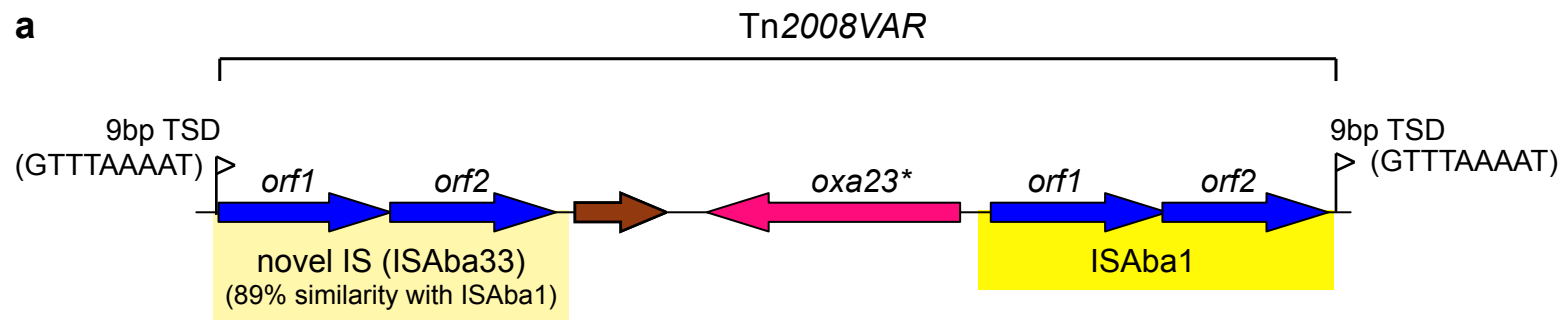**b**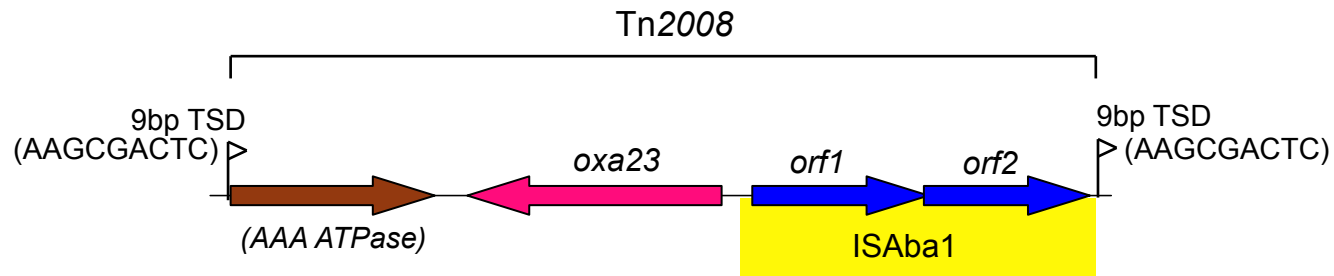

Supplement: Supplementary file 2 [file 1]

**a**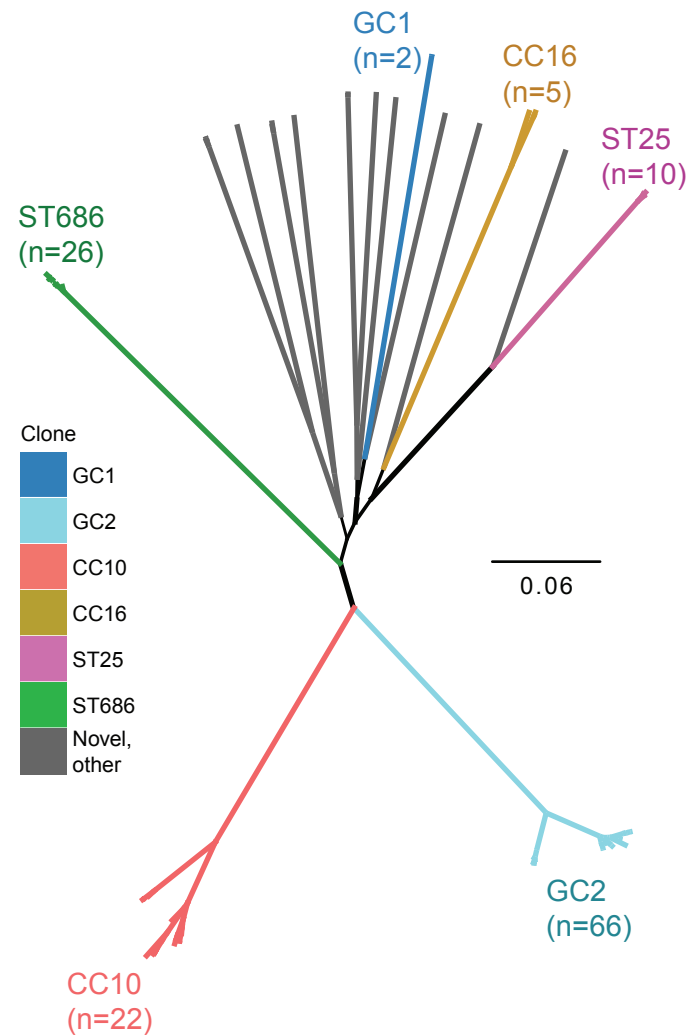**b**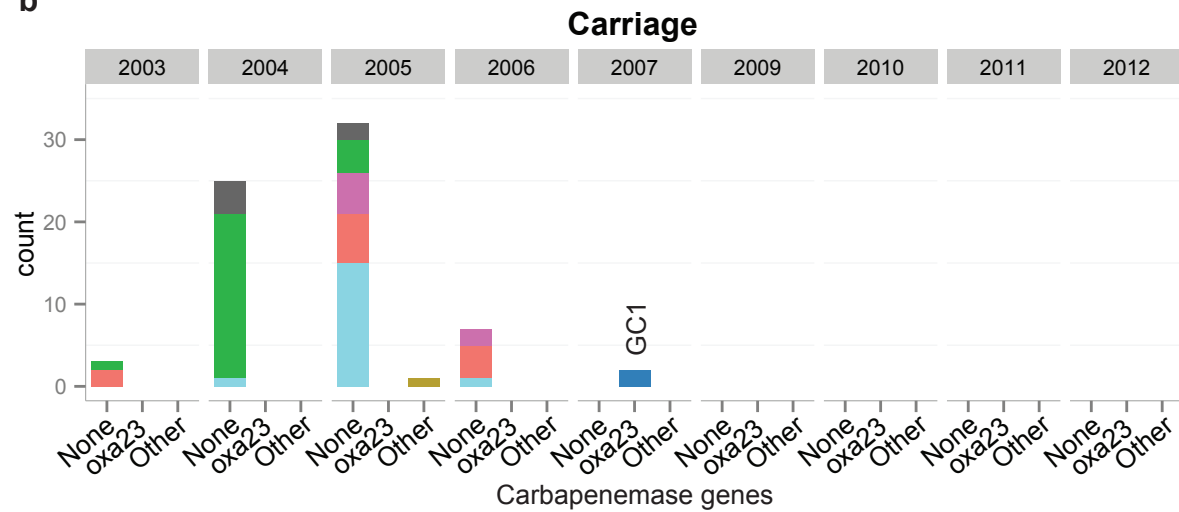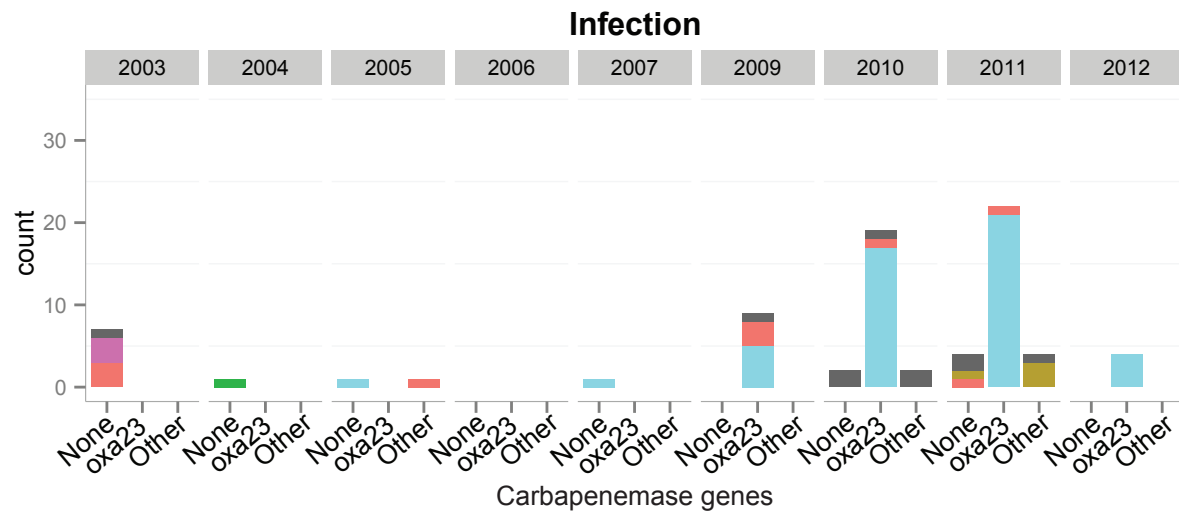

Supplement: Supplementary file 3 [file 1]

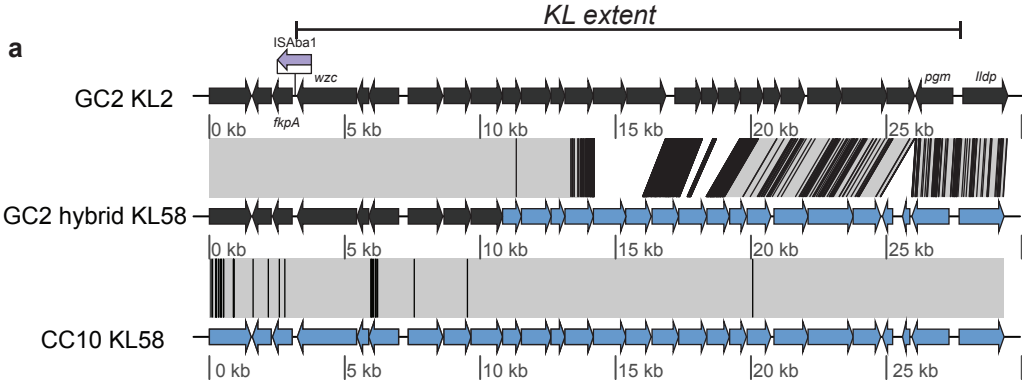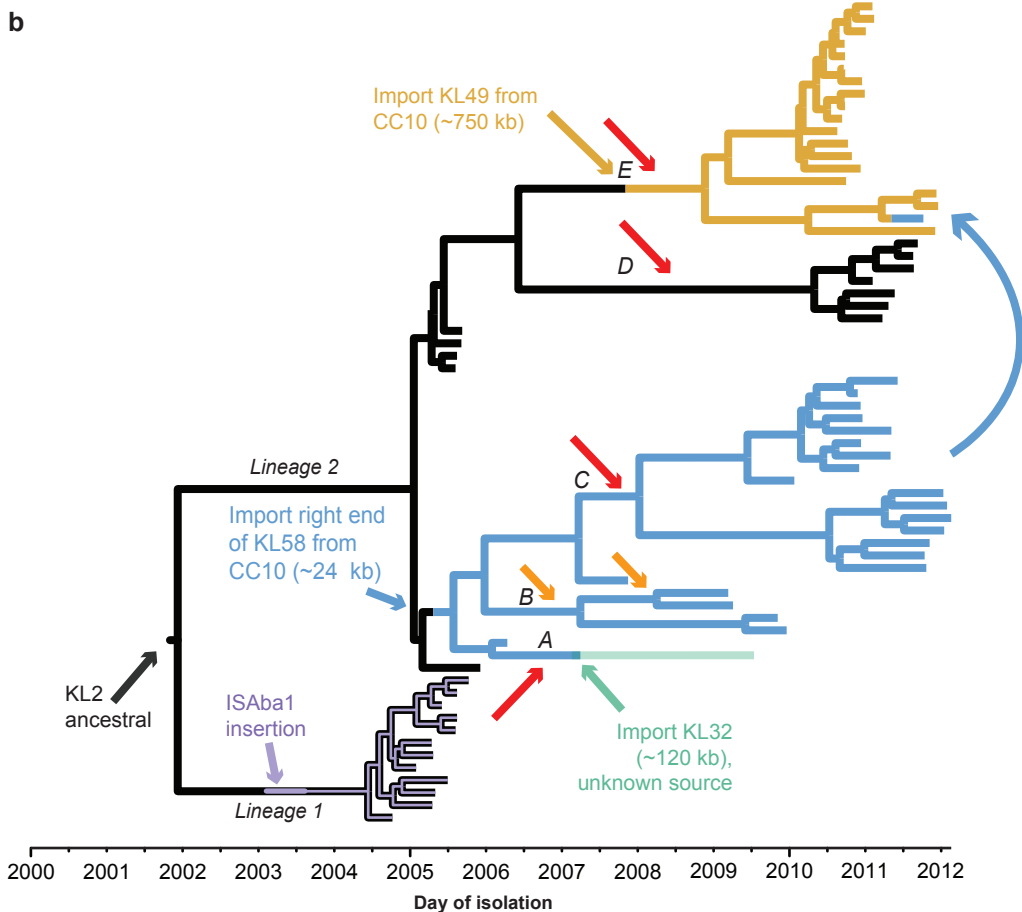

Supplement: Supplementary file 6 [file 1]

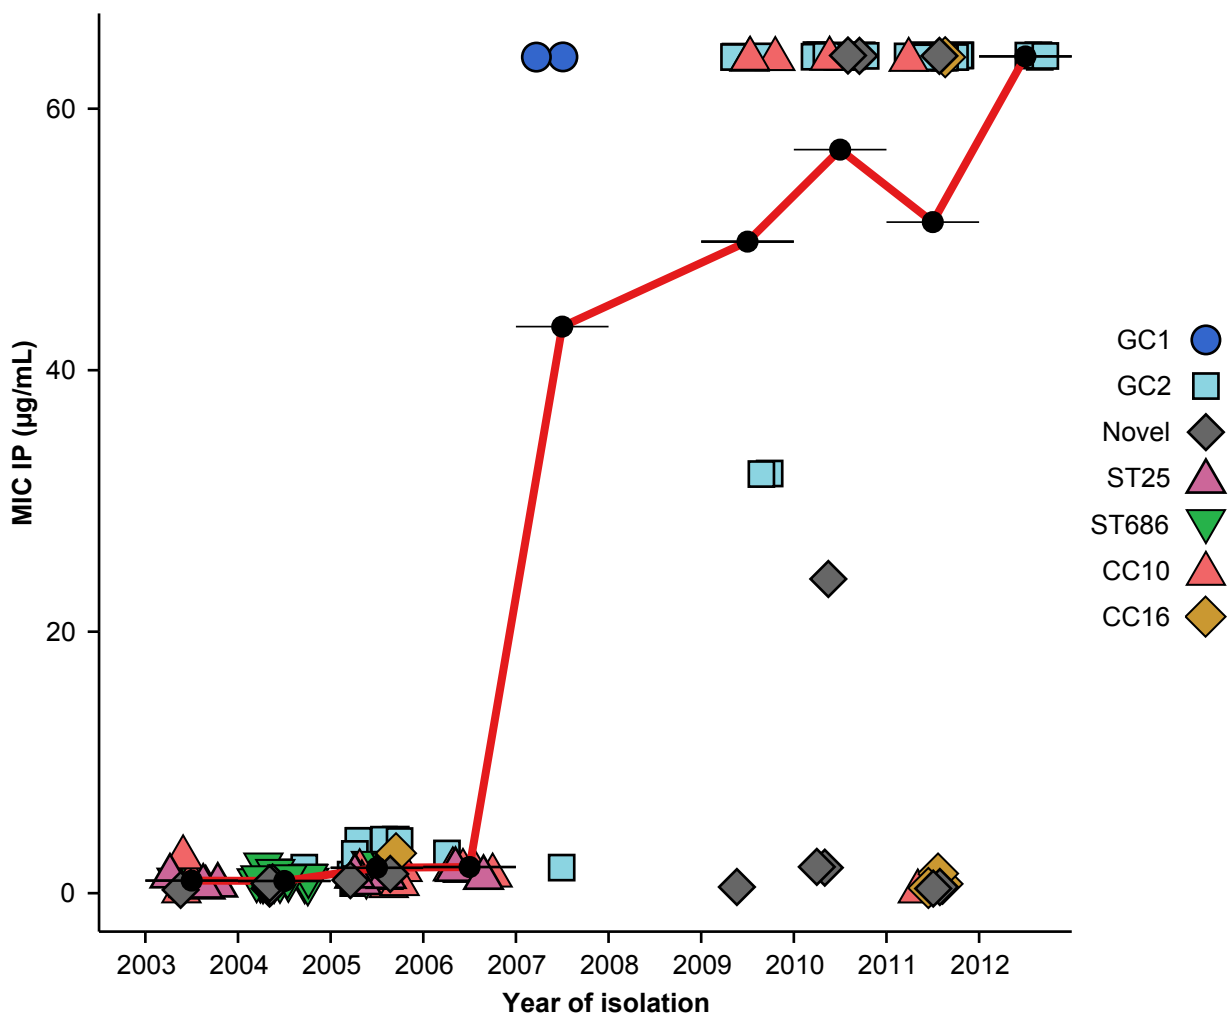

Supplement: Supplementary file 7 [file 1]

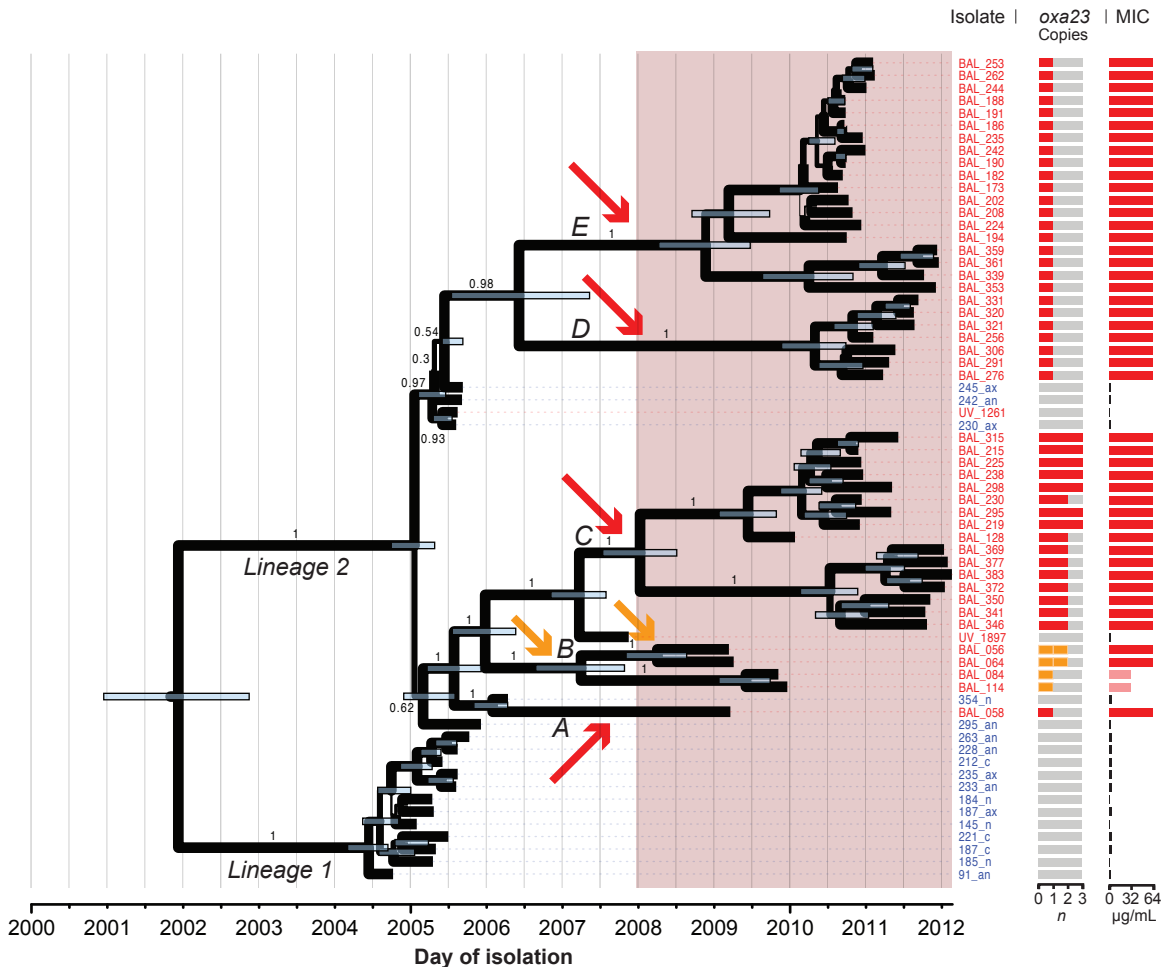

Supplement: Supplementary file 8 [file 1]
